# Supplementary material for: Green synthesis of a thermo/photochromic doped cellulose polymer: a biocompatible film for potential application in cold chain visual tracking
Source: Royal Society of Chemistry journal article supplement (doi:10.1039/d4me00055b), 2024-01-01
Supplement: d4me00055b1.pdf [file d4me00055b1.pdf]

## Electronic Supplementary Information

### GREEN SYNTHESIS OF THERMO/PHOTOCHROMIC DOPED CELLULOSE POLYMER: A BIOCOMPATIBLE FILM FOR POTENTIAL APPLICATION IN COLD CHAIN VISUAL TRACKING.

A. Azzali,<sup>a,b±</sup> M. F. Di Filippo,<sup>a,±</sup> L. Bertuccioli,<sup>a</sup> S. Lilburn<sup>a,c</sup>, S. Panzavolta,<sup>a,\*</sup> F. Grepioni<sup>a</sup> and S. d'Agostino<sup>a,\*</sup>

<sup>a</sup> Department of Chemistry "Giacomo Ciamician" – The University of Bologna, via F. Selmi 2, 40126, Bologna, Italy.

<sup>b</sup> *Present address: Department of Inorganic Chemistry - University of Granada, Avenida de la Fuente Nueva S/N 18071 Granada, Spain*

<sup>c</sup> *Present address: University College Cork, T12 YN60, Cork, Ireland*

#### Table of contents

---

|                                                                           |        |
|---------------------------------------------------------------------------|--------|
| <sup>1</sup> HNMR and <sup>13</sup> CNMR spectra of compounds <b>1-5</b>  | ESI-2  |
| Crystal Data and Refinement Details                                       | ESI-5  |
| Powder XRD Patterns                                                       | ESI-6  |
| TGA thermograms                                                           | ESI-8  |
| DSC-traces                                                                | ESI-8  |
| FTIR Spectra                                                              | ESI-10 |
| Mechanical Properties Characterization of the Photochromic Film CMC-5@15% | ESI-11 |

---

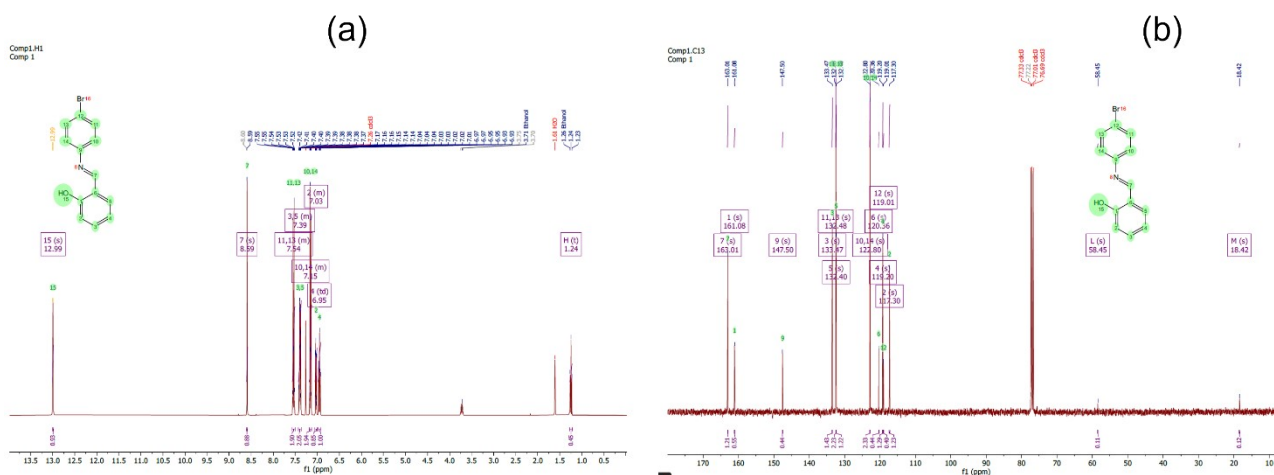

**Figure S1.** (a)  $^1\text{H}$ NMR (400 MHz) and (b)  $^{13}\text{C}$ NMR (100 MHz) of compound **1** in  $\text{CDCl}_3$ .  $^1\text{H}$  NMR (400 MHz,  $\text{cdcl}_3$ )  $\delta$  12.98 (s, 1H, H15), 8.57 (s, 1H, H7), 7.57 – 7.47 (m, 2H, H11, H13), 7.42 – 7.32 (m, 2H, H3, H5), 7.18 – 7.09 (m, 2H, H10, H14), 7.04 – 6.98 (m, 1H, H2), 6.93 (td,  $J$  = 7.5, 1.0 Hz, 1H, H4), 1.61 (water), 1.23 (t,  $J$  = 7.0 Hz, Ethanol).

$^{13}\text{C}$  NMR (101 MHz,  $\text{cdcl}_3$ )  $\delta$  162.99 (s, C7), 161.07 (s, C1), 147.48 (s, C9), 133.45 (s, C3), 132.46 (s, C11, C13), 132.38 (s, C5), 122.79 (s, C10, C14), 120.34 (s, C6), 119.19 (s, C12), 118.99 (s, C4), 117.29 (s, C2), 18.42 (s).

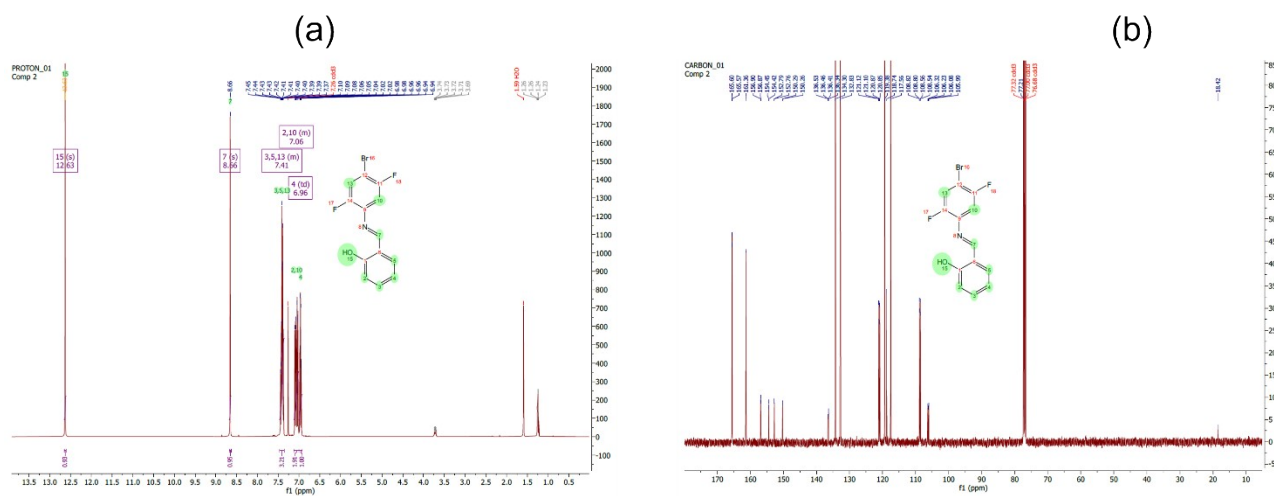

**Figure S2.** (a)  $^1\text{H}$ NMR (400 MHz) and (b)  $^{13}\text{C}$ NMR (100 MHz) of compound **2** in  $\text{CDCl}_3$ .  $^1\text{H}$  NMR (400 MHz,  $\text{cdcl}_3$ )  $\delta$  12.61 (s, 1H, H15), 8.64 (s, 1H, H7), 7.46 – 7.33 (m, 3H, H3, H5, H13), 7.24 (s, 1H, H2, H10), 7.11 – 6.90 (m, 1H, H4).

$^{13}\text{C}$  NMR (101 MHz,  $\text{cdcl}_3$ )  $\delta$  165.57 (d,  $J$  = 3.2 Hz, C11), 161.34 (s, C7, C1), 156.86 (d,  $J$  = 3.1 Hz, C14), 154.42 (d,  $J$  = 3.2 Hz), 152.76 (d,  $J$  = 3.1 Hz), 150.26 (d,  $J$  = 3.1 Hz), 136.42 (dd,  $J$  = 12.0, 7.3 Hz), 134.28 (s, C5), 132.81 (s, C3), 120.97 (dd,  $J$  = 25.0, 1.3 Hz, C13), 119.36 (s, C4), 118.73 (s, C6), 117.55 (s, C2), 108.67 (dd,  $J$  = 25.6, 1.8 Hz, C12).

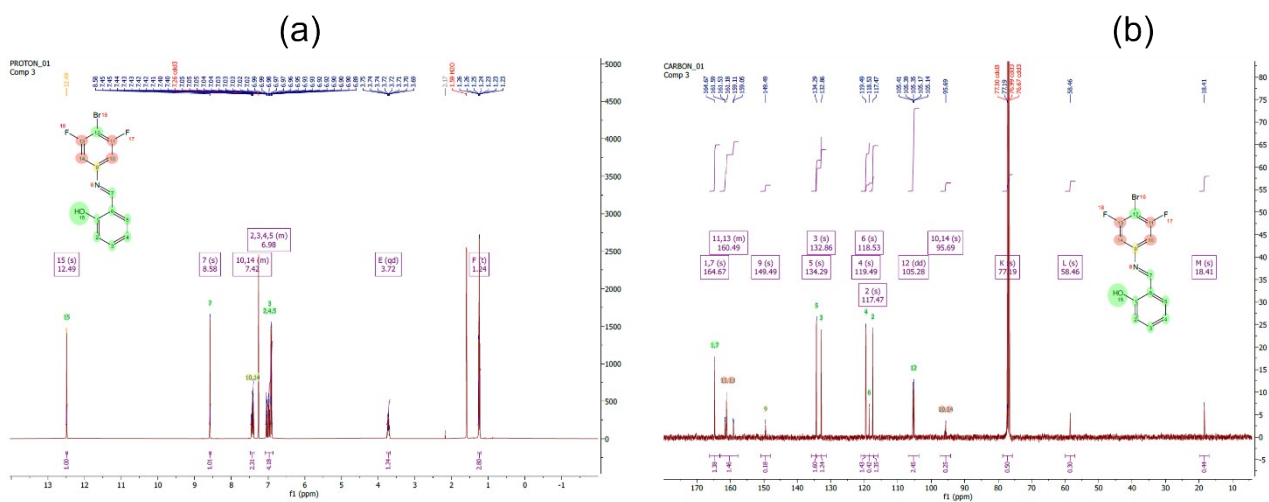

**Figure S3.** (a)  $^1\text{H}$ NMR (400 MHz) and (b)  $^{13}\text{C}$ NMR (100 MHz) of compound **3** in  $\text{CDCl}_3$ .

$^1\text{H}$  NMR (400 MHz,  $\text{cdCl}_3$ )  $\delta$  12.47 (s, 1H, H15), 8.56 (s, 1H, H7), 7.46 – 7.35 (m, 2H, H13, H14), 7.04 – 6.85 (m, 4H, H2, H3, H4, H5).

$^{13}\text{C}$  NMR (101 MHz,  $\text{cdCl}_3$ )  $\delta$  164.65 (s, C1, C7), 161.83 – 160.58 (m, C11, C13), 149.48 (s, C9), 134.27 (s, C5), 132.84 (s, C3), 119.48 (s, C4), 118.52 (s, C6), 117.46 (s, C2), 105.26 (dd,  $J$  = 24.9, 2.7 Hz, C12), 95.67 (s, C10, C14), 77.23 ( $\text{cdCl}_3$ ), 58.45 (s), 18.40 (s).

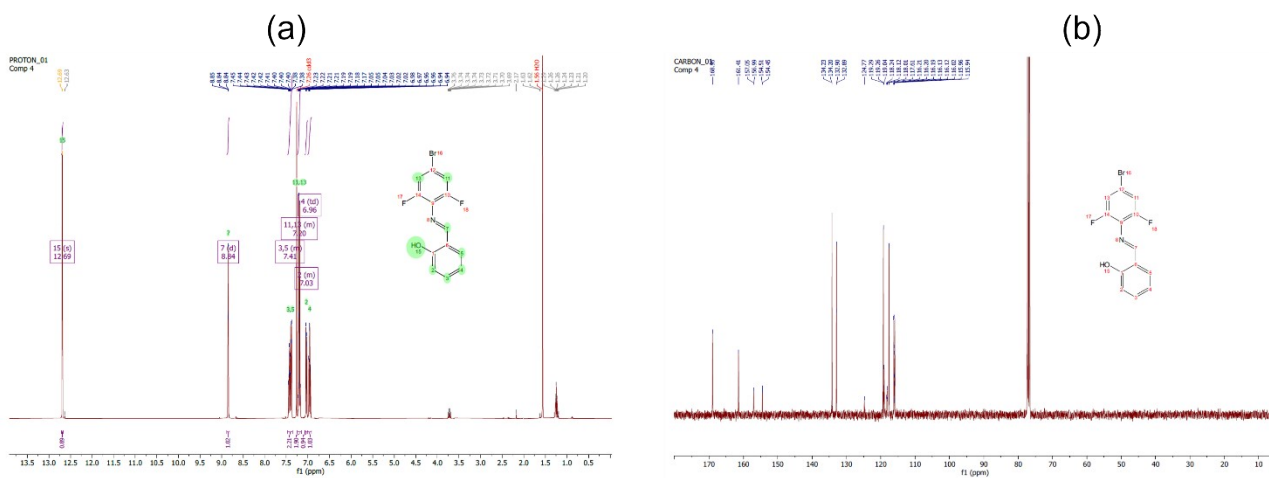

**Figure S4.** (a)  $^1\text{H}$ NMR (400 MHz) and (b)  $^{13}\text{C}$ NMR (100 MHz) of compound **4** in  $\text{CDCl}_3$ .

$^1\text{H}$  NMR (400 MHz,  $\text{cdCl}_3$ )  $\delta$  12.67 (s, 1H, H15), 8.83 (s, 1H, H7), 7.45 – 7.33 (m, 2H, H3, H5), 7.21 – 7.11 (m, 2H, H11, H13), 7.02 (d,  $J$  = 8.3 Hz, 1H, H2), 6.94 (td,  $J$  = 7.7, 1.0 Hz, 1H, H4).

$^{13}\text{C}$  NMR (101 MHz,  $\text{cdCl}_3$ )  $\delta$  168.93 (t,  $J$  = 5.1 Hz, C1), 161.39 (s, C7), 157.01 (d,  $J$  = 6.1 Hz, C10, C14), 154.47 (d,  $J$  = 6.0 Hz, C9), 134.21 (s, C3), 132.88 (s, C5), 119.24 (s, C6), 119.02 (s, C12), 118.11 (s, C4), 117.59 (s, C2), 116.30 – 115.83 (m, C13, C11).

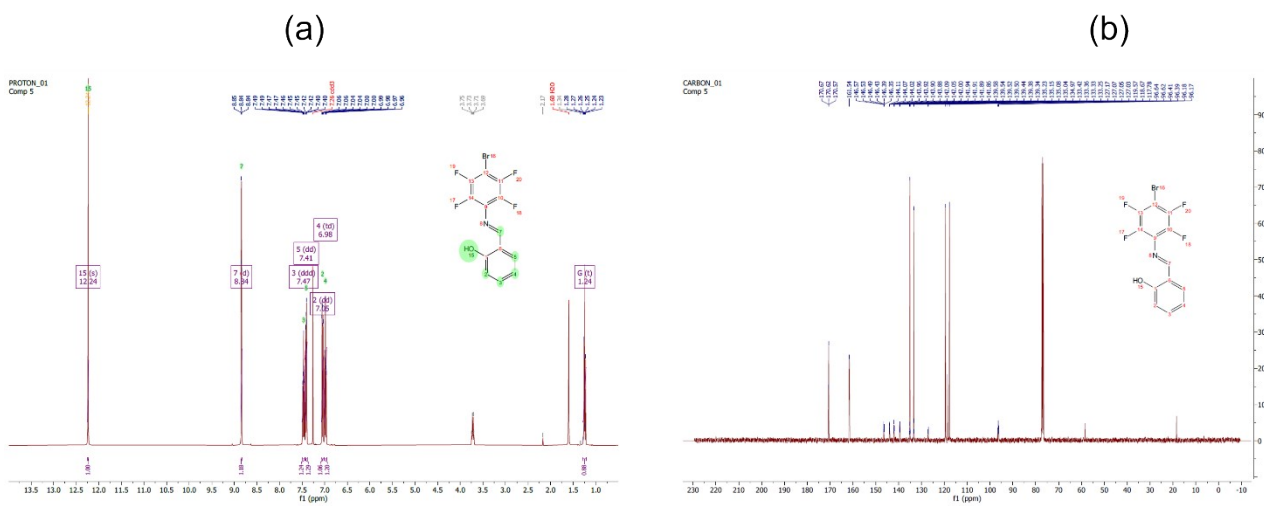

**Figure S5.** (a)  $^1\text{H}$ NMR (400 MHz) and (b)  $^{13}\text{C}$ NMR (100 MHz) of compound **5** in  $\text{CDCl}_3$ .

$^1\text{H}$  NMR (400 MHz,  $\text{cdcl}_3$ )  $\delta$  12.22 (s, 1H, H15), 8.82 (s, 1H, H7), 7.51 – 7.42 (m, 1H, H3), 7.39 (dd,  $J$  = 7.7, 1.6 Hz, 1H, H5), 7.03 (d,  $J$  = 8.3 Hz, 1H, H2), 7.00 – 6.92 (m, 1H, H4).

$^{13}\text{C}$  NMR (101 MHz,  $\text{cdcl}_3$ )  $\delta$  170.60 (t,  $J$  = 4.9 Hz, C7), 161.52 (s, C1), 146.51 - 139.37 (m, C13, C11), 135.07 (s, C14, C10), 133.35 (s, C3, C5), 119.55 (s, C9), 118.65 (s, C4), 117.76 (s, C6), 96.38 (s, C2).

### Crystal Data and Refinement Details

**Table S1.** Crystal data and refinement details for compounds **1-5** collected at RT.

|                                          | <b>1</b>                             | <b>2</b>                                           | <b>3</b>                                           | <b>4</b>                                           | <b>5</b>                                           |
|------------------------------------------|--------------------------------------|----------------------------------------------------|----------------------------------------------------|----------------------------------------------------|----------------------------------------------------|
| <b>Formula</b>                           | C <sub>13</sub> H <sub>10</sub> BrNO | C <sub>13</sub> H <sub>8</sub> BrF <sub>2</sub> NO | C <sub>13</sub> H <sub>8</sub> BrF <sub>2</sub> NO | C <sub>13</sub> H <sub>8</sub> BrF <sub>2</sub> NO | C <sub>13</sub> H <sub>6</sub> BrF <sub>4</sub> NO |
| <b>FW (g/mol)</b>                        | 276.13                               | 312.11                                             | 312.11                                             | 312.11                                             | 348.10                                             |
| <b>Crystal System</b>                    | Orthorhombic                         | Monoclinic                                         | Triclinic                                          | Triclinic                                          | Monoclinic                                         |
| <b>Space Group</b>                       | Pca2 <sub>1</sub>                    | P2 <sub>1</sub>                                    | P-1                                                | P-1                                                | P2 <sub>1</sub>                                    |
| <b>a/Å</b>                               | 6.2262(3)                            | 5.4360(9)                                          | 6.9293(12)                                         | 7.2141(6)                                          | 6.0196(6)                                          |
| <b>b/Å</b>                               | 7.0317(4)                            | 19.728(3)                                          | 7.4667(9)                                          | 7.5974(6)                                          | 7.4659(9)                                          |
| <b>c/Å</b>                               | 26.2485(12)                          | 5.8339(10)                                         | 12.746(2)                                          | 11.6575(8)                                         | 13.8518(9)                                         |
| <b>α/°</b>                               | 90                                   | 90                                                 | 74.781(13)                                         | 79.343(6)                                          | 90                                                 |
| <b>β/°</b>                               | 90                                   | 105.561(17)                                        | 84.546(14)                                         | 79.021(6)                                          | 95.881(7)                                          |
| <b>γ/°</b>                               | 90                                   | 90                                                 | 69.627(14)                                         | 71.454(7)                                          | 90                                                 |
| <b>Volume/Å<sup>3</sup></b>              | 1149.18(10)                          | 602.69(18)                                         | 596.53(17)                                         | 589.33(8)                                          | 619.25(11)                                         |
| <b>Z</b>                                 | 4                                    | 2                                                  | 2                                                  | 2                                                  | 2                                                  |
| <b>ρ<sub>calc</sub> g/cm<sup>3</sup></b> | 1.596                                | 1.720                                              | 1.738                                              | 1.759                                              | 1.867                                              |
| <b>μ/mm<sup>-1</sup></b>                 | 3.553                                | 3.421                                              | 3.457                                              | 3.499                                              | 3.363                                              |
| <b>measd rflns</b>                       | 3124                                 | 4760                                               | 4589                                               | 6198                                               | 4719                                               |
| <b>indep rflns</b>                       | 1714                                 | 2288                                               | 2731                                               | 2521                                               | 2383                                               |
| <b>R<sub>1</sub></b>                     | 0.0462                               | 0.0654                                             | 0.0518                                             | 0.0514                                             | 0.0504                                             |
| <b>wR<sub>2</sub></b>                    | 0.0868                               | 0.1830                                             | 0.1001                                             | 0.0897                                             | 0.1100                                             |

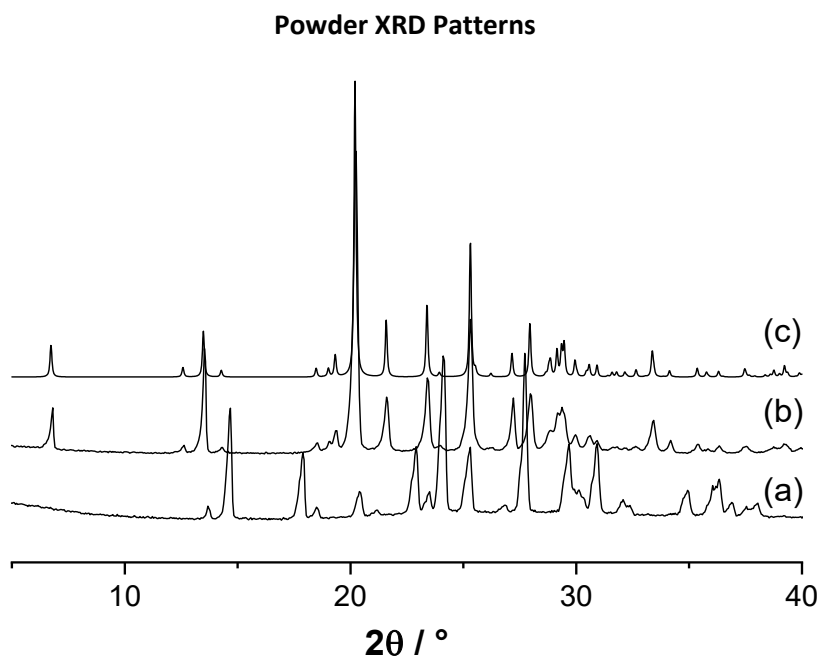

**Figure S6.** Powder XRD patterns of mechanochemical synthesis of compound **1**. (a) bromoaniline experimental pattern (b) bromoaniline ground with 1 equivalent of salicylaldehyde, and (c) calculated powder pattern for crystalline **1**.

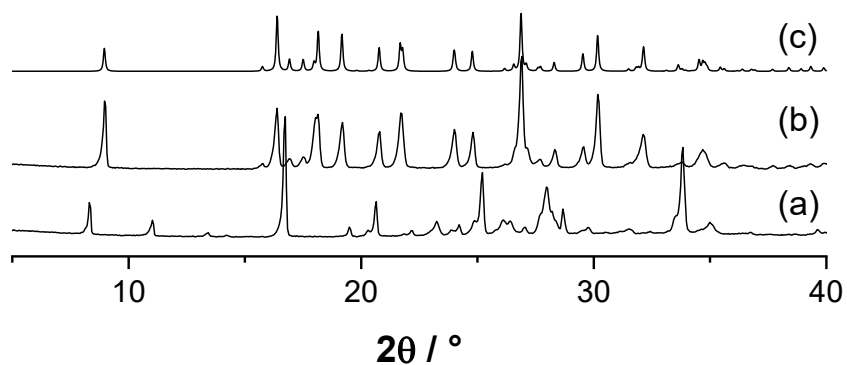

**Figure S7.** Powder XRD patterns of mechanochemical synthesis of compound **2**. (a) 2,5-dibromoaniline experimental pattern (b) 2,5-dibromoaniline ground with 1 equivalent of salicylaldehyde, and (c) calculated powder pattern for crystalline **2**.

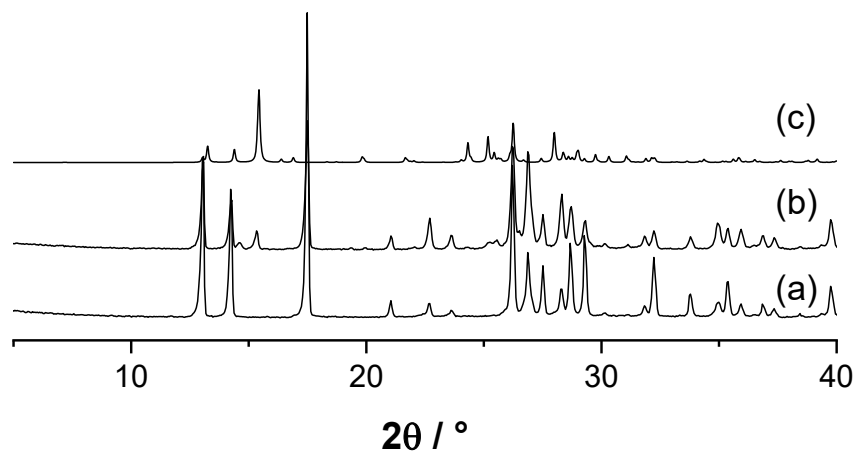

**Figure S8.** Powder XRD patterns of mechanochemical synthesis of compound **3**. (a) 3,5-dibromoaniline experimental pattern (b) 3,5-dibromoaniline ground with 1 equivalent of salicylaldehyde, and (c) calculated powder pattern for crystalline **3**.

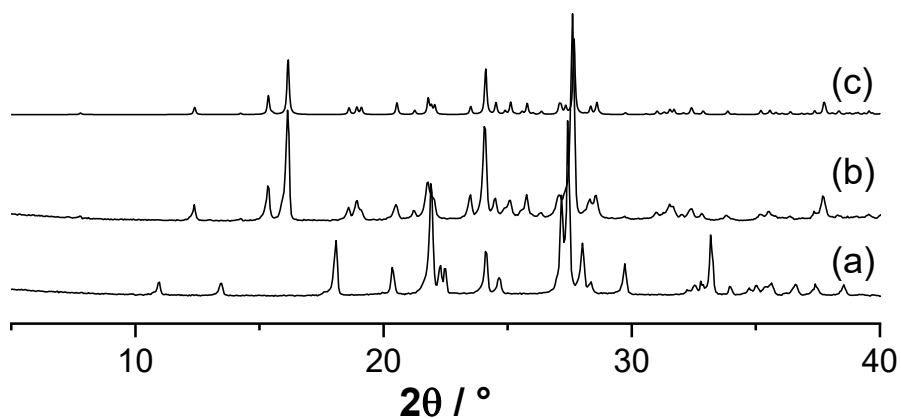

**Figure S9.** Powder XRD patterns of mechanochemical synthesis of compound **4**. (a) 2,6-dibromoaniline experimental pattern (b) 2,6-dibromoaniline ground with 1 equivalent of salicylaldehyde, and (c) calculated powder pattern for crystalline **4**.

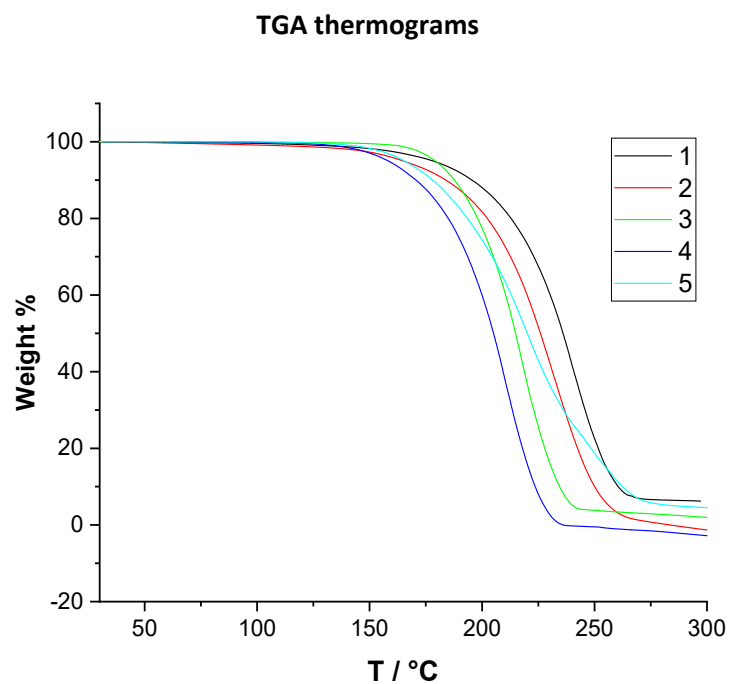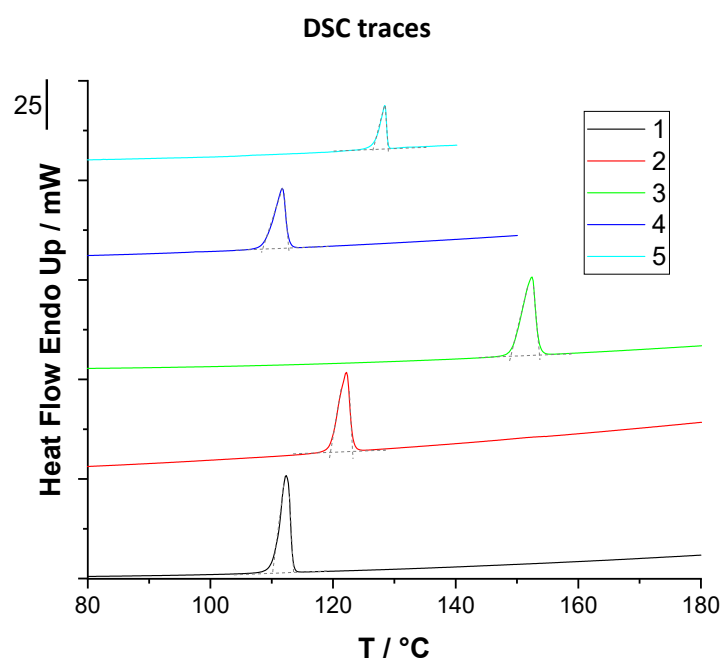

**Table S2.** DSC data of compounds 1-5.

| Compound | Onset (°C) | Peak (°C) | Endpoint (°C) | $\Delta H$ (KJ/mol) |
|----------|------------|-----------|---------------|---------------------|
| 1        | 110        | 112       | 113           | 26                  |
| 2        | 119        | 122       | 123           | 25                  |
| 3        | 149        | 152       | 153           | 28                  |
| 4        | 108        | 111       | 112           | 28                  |
| 5        | 126        | 128       | 129           | 27                  |



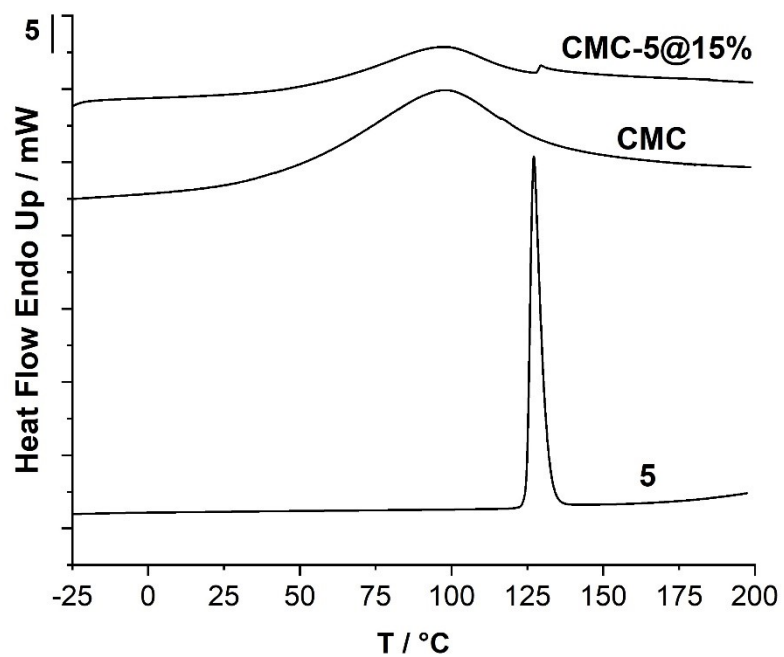

**Figure S12.** DSC traces of the pristine CMC film, polycrystalline **5**, and the CMC-**5**@15% composite film.

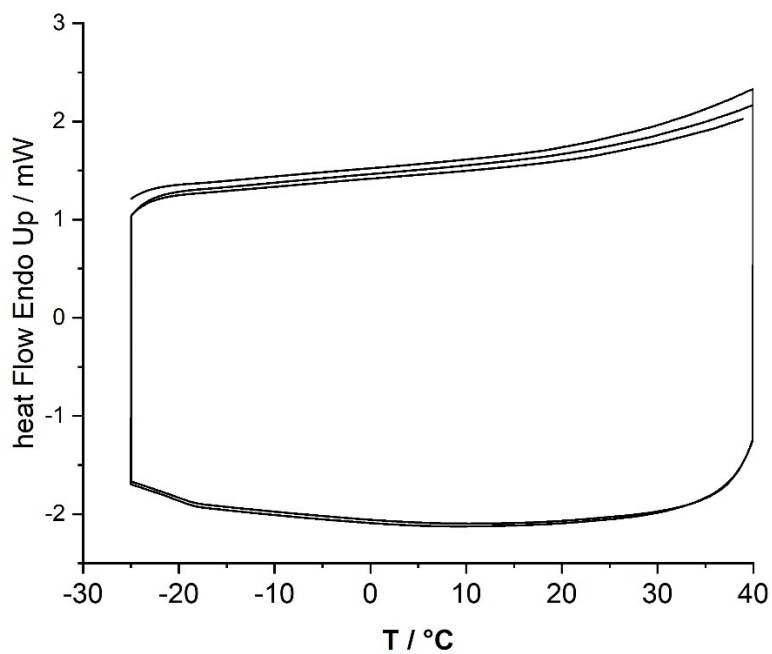

**Figure S13.** DSC cycles of the CMC-**5**@15% composite film measured from -25 °C to 40 °C. No degradation of the sample was detected.

### FTIR Spectra

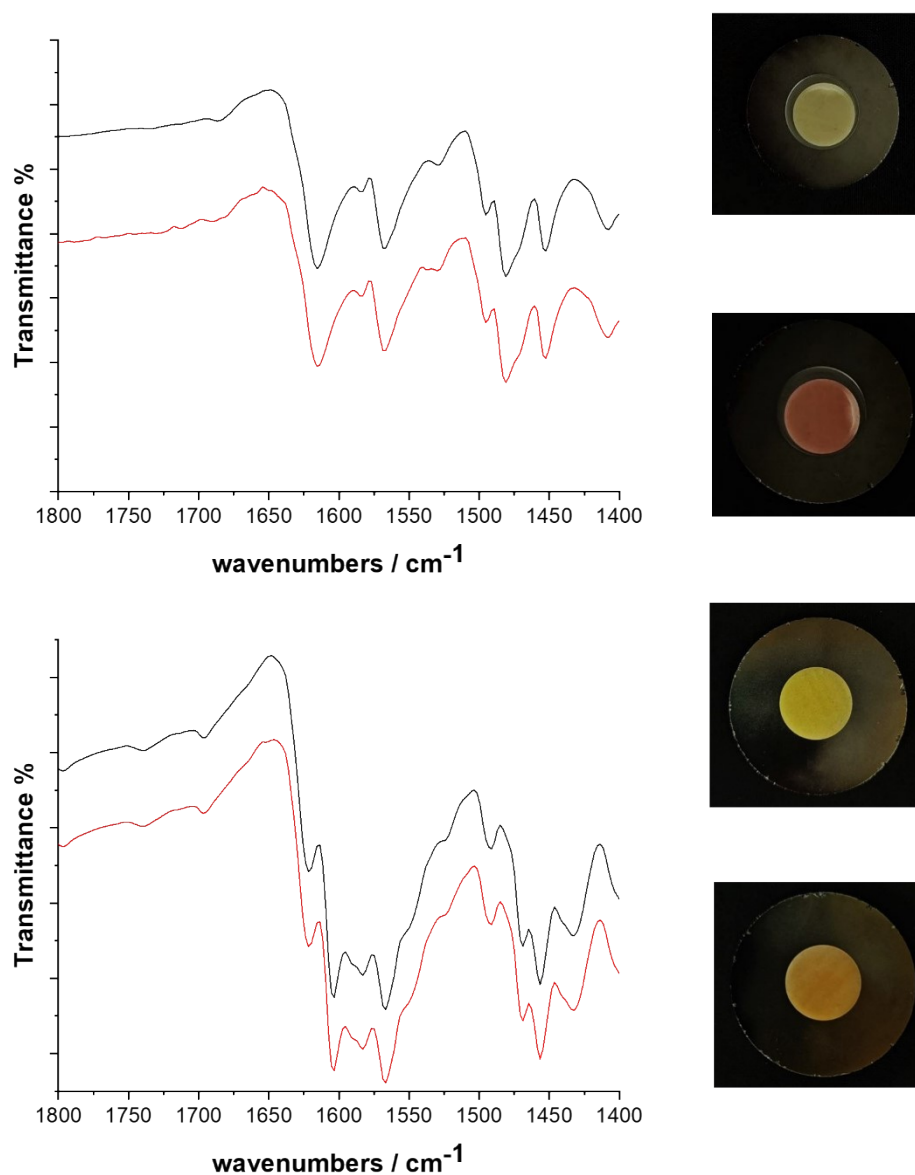

**Figure S14.** Detail of the FTIR spectra run before (black line) and after UV irradiation (redline) and difference spectra between the untreated and irradiated samples of compounds **1** (top) and **3** (bottom) and photographs of the KBr pellets used for the FTIR measurements. Although they are both photochromic, the trans-keto tautomers were not detected because of fast thermal recovery in **1**, and likely low amount formed in **3**.

Mechanical characterization of the photochromic film CMC-5@15%

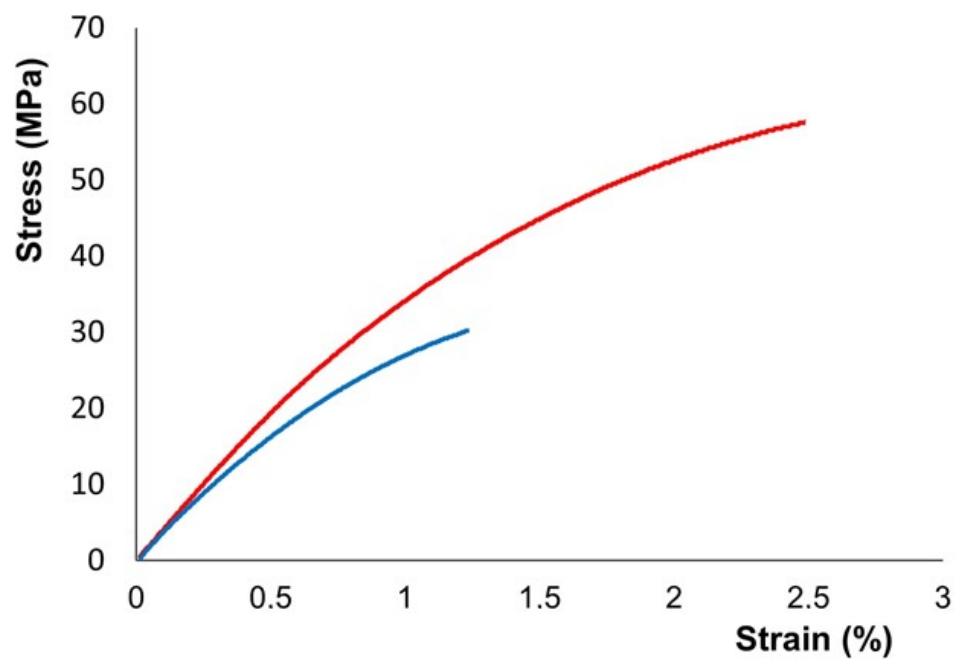

Figure S15. Stress-strain curves of pure CMC (red-line) and CMC-5@15% (blue-line).
